# Supplementary material for: Morphological Attributes Govern CO2 Reduction on Mesoporous Carbon Nanosphere with Embedded Axial Co-N5 Sites
Source: Research Square preprint supplement (doi:10.21203/rs.3.rs-999257/v1), 2021-10-29
Supplement: Supplementary file 1 [file 112d42958c49bf4c85eedab6.docx]

**Supplementary information**

**Morphological Attributes Govern CO2 Reduction on Mesoporous Carbon Nanosphere with Embedded Axial Co-N5 Sites**

*Youzhi Li1, Bo Wei2, Zhongjian Li1*, Lei Fan1,Qike Jiang3, Lecheng Lei1, Ruifeng Zhang2*,Yingying Lu1**


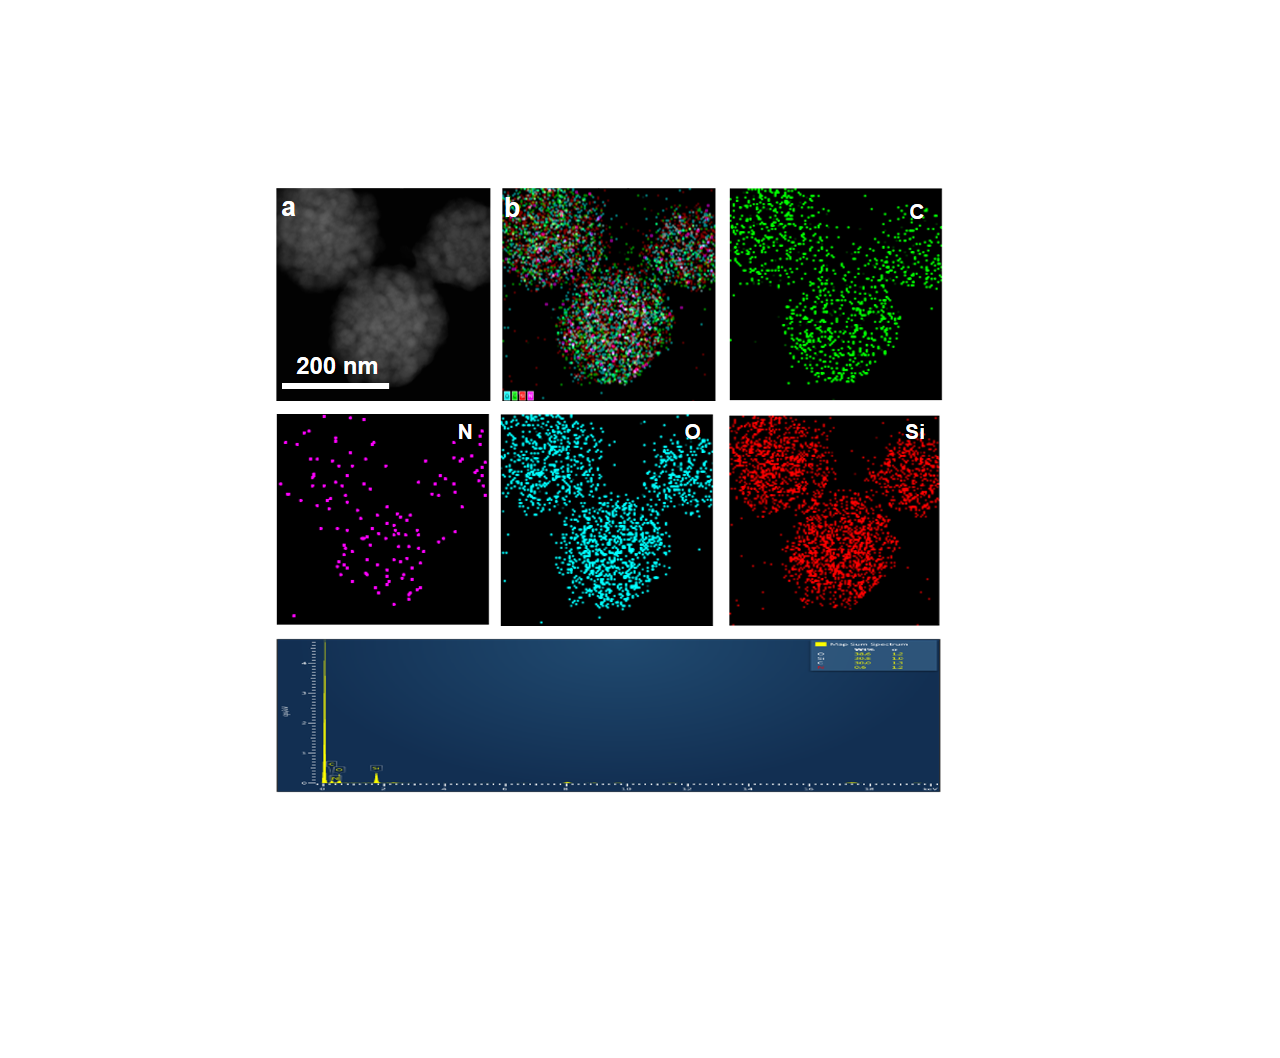


**Supplementary Figure 1.** EDX mappings of C, N, Oand Si elements of SiO2@PANI and EDX spectrum


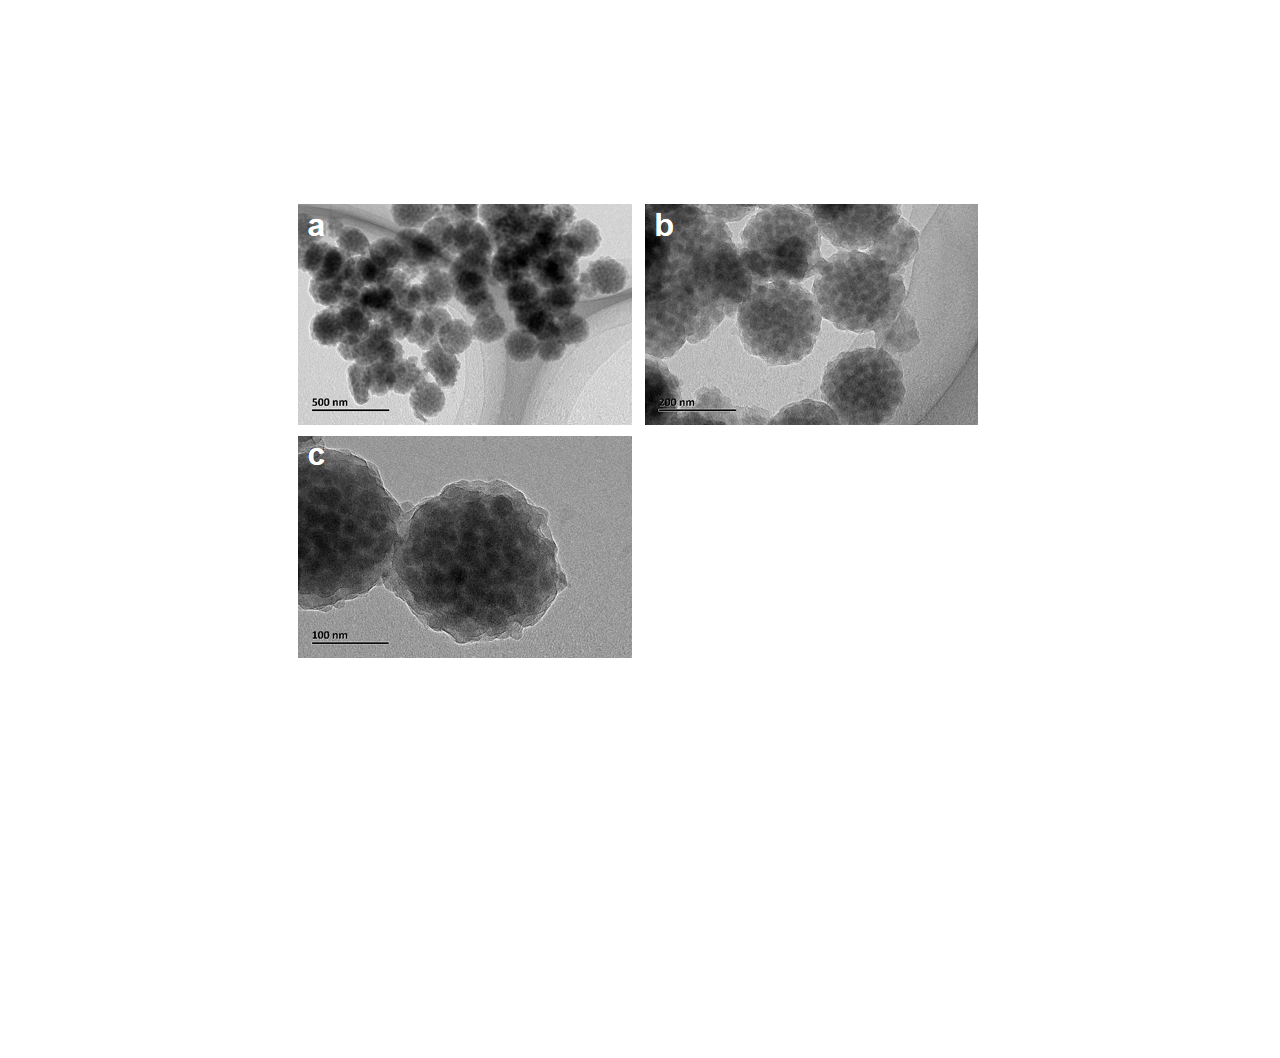


**Supplementary Figure 2.** (**a**)-(**c**)A typical TEM image of SiO2@PANI


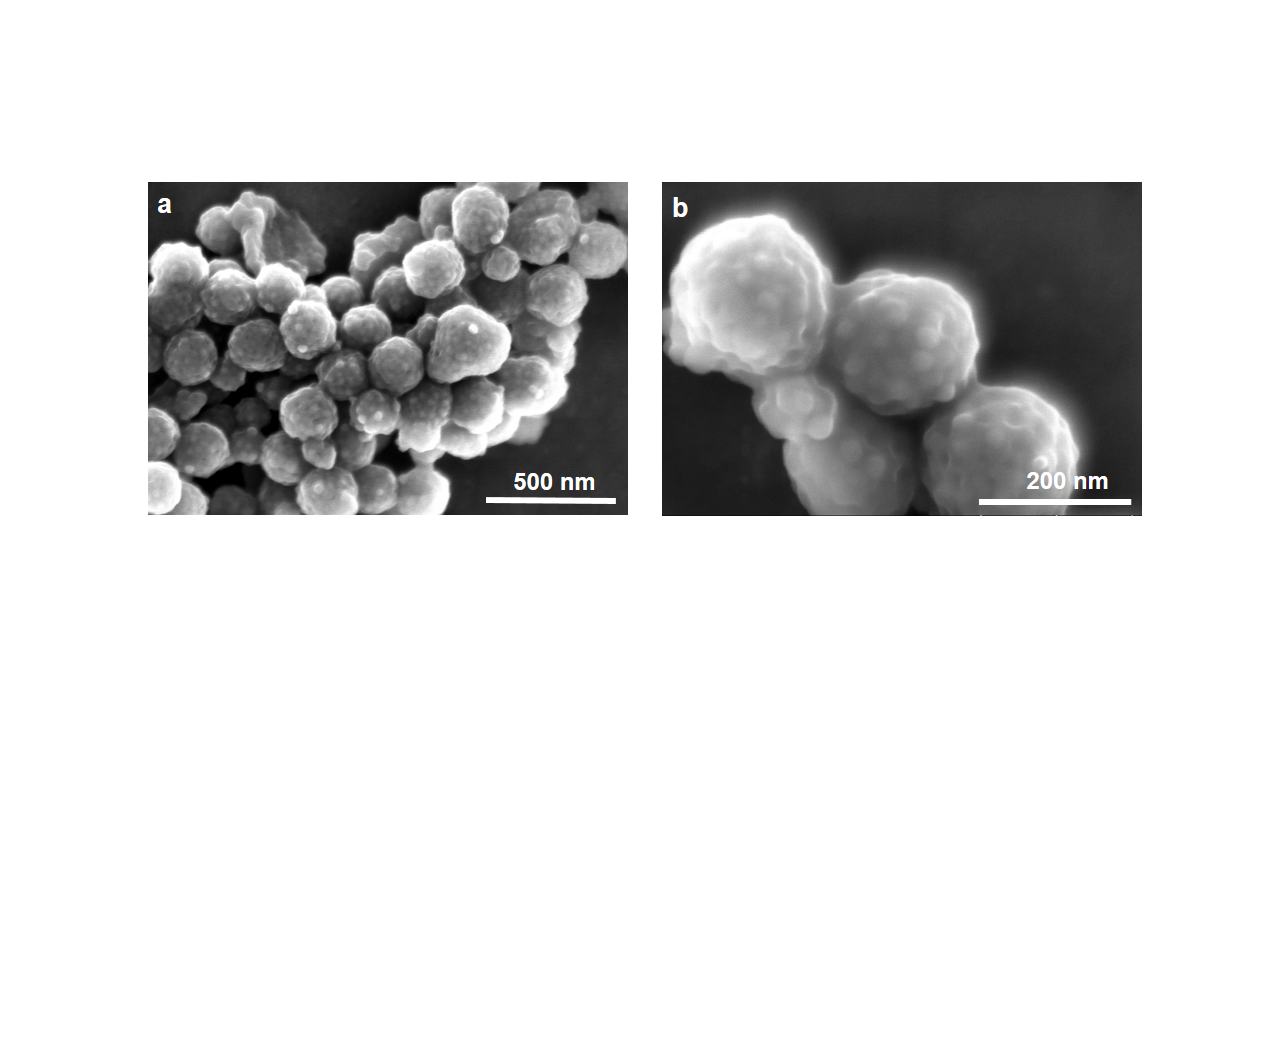


**Supplementary Figure 3.** (**a**)-(**b**)A typical SEM image of SiO2@PANI


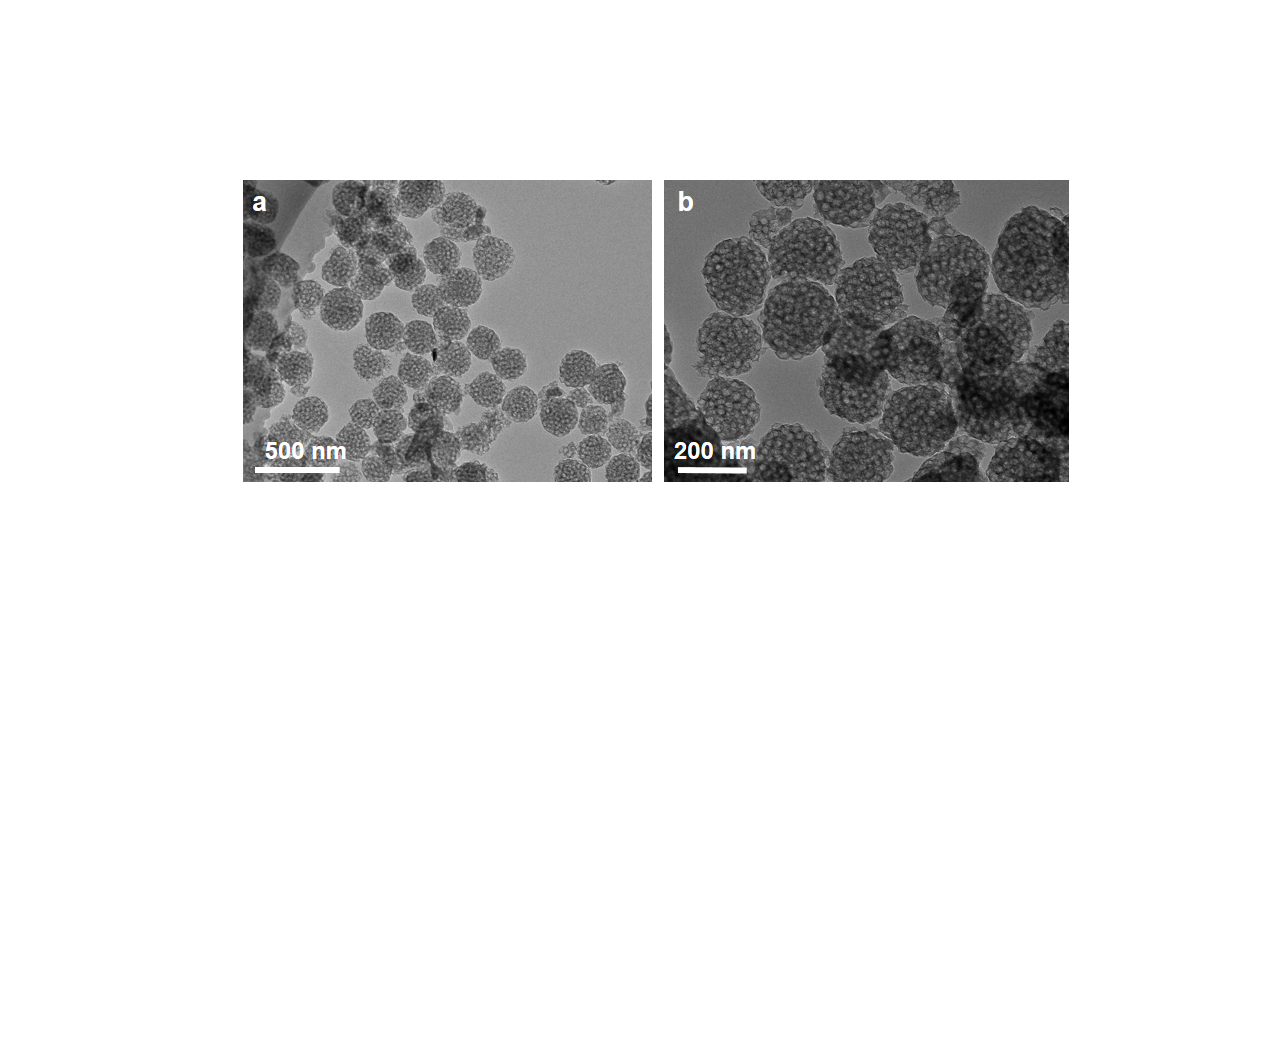


**Supplementary Figure 4**. (**a**)-(**b**) Low-magnification TEM images of Co-MSPNC


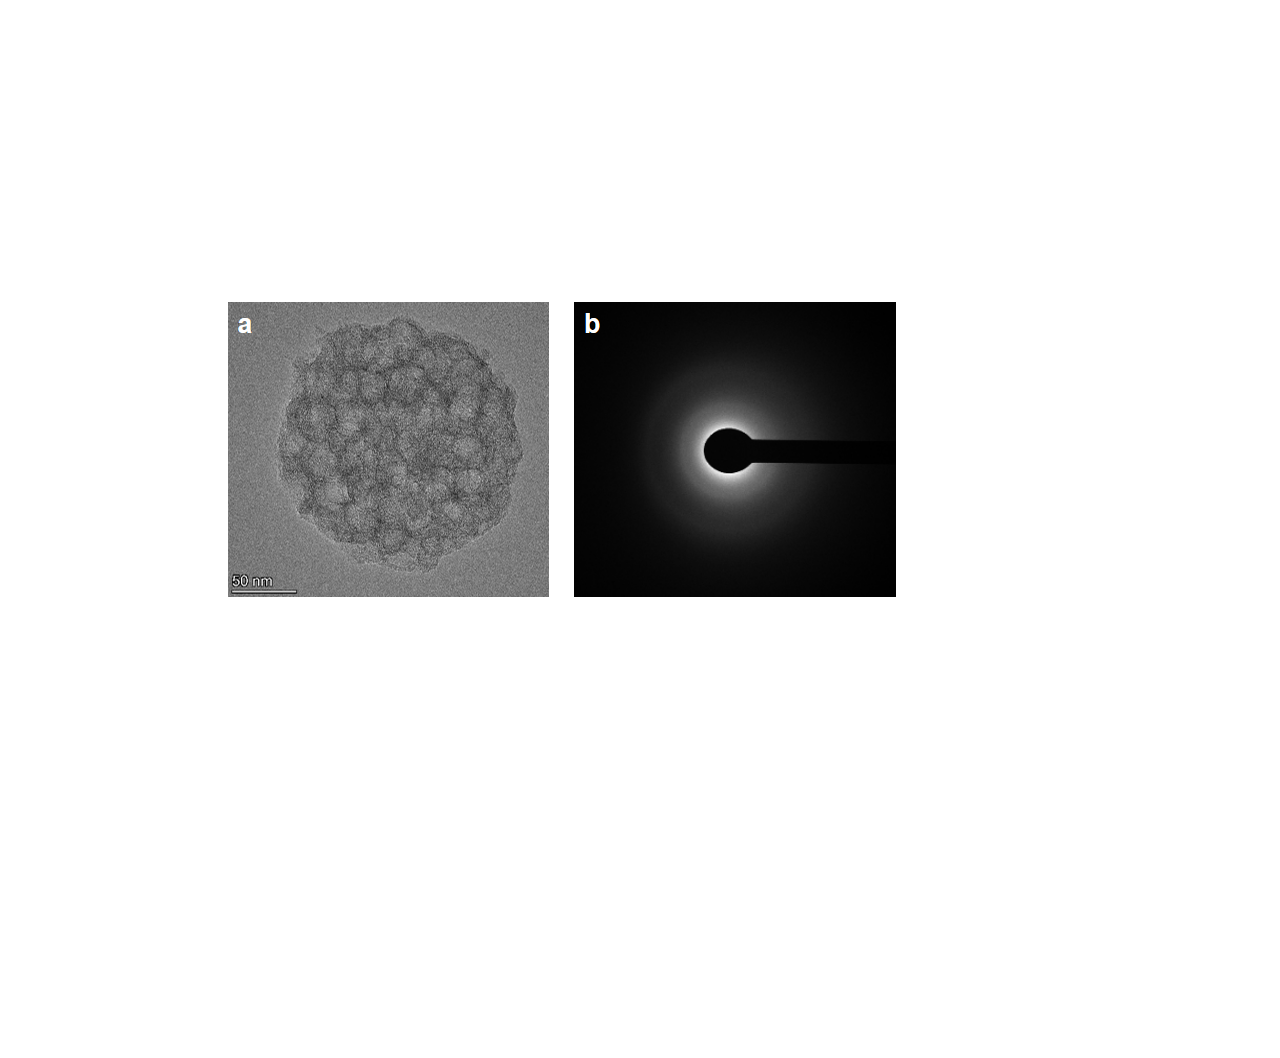


**Supplementary Figure 5.** (**a**) High-magnification TEM images of Co-MSPNC and (**b**) SAED images of Co-MSPNC


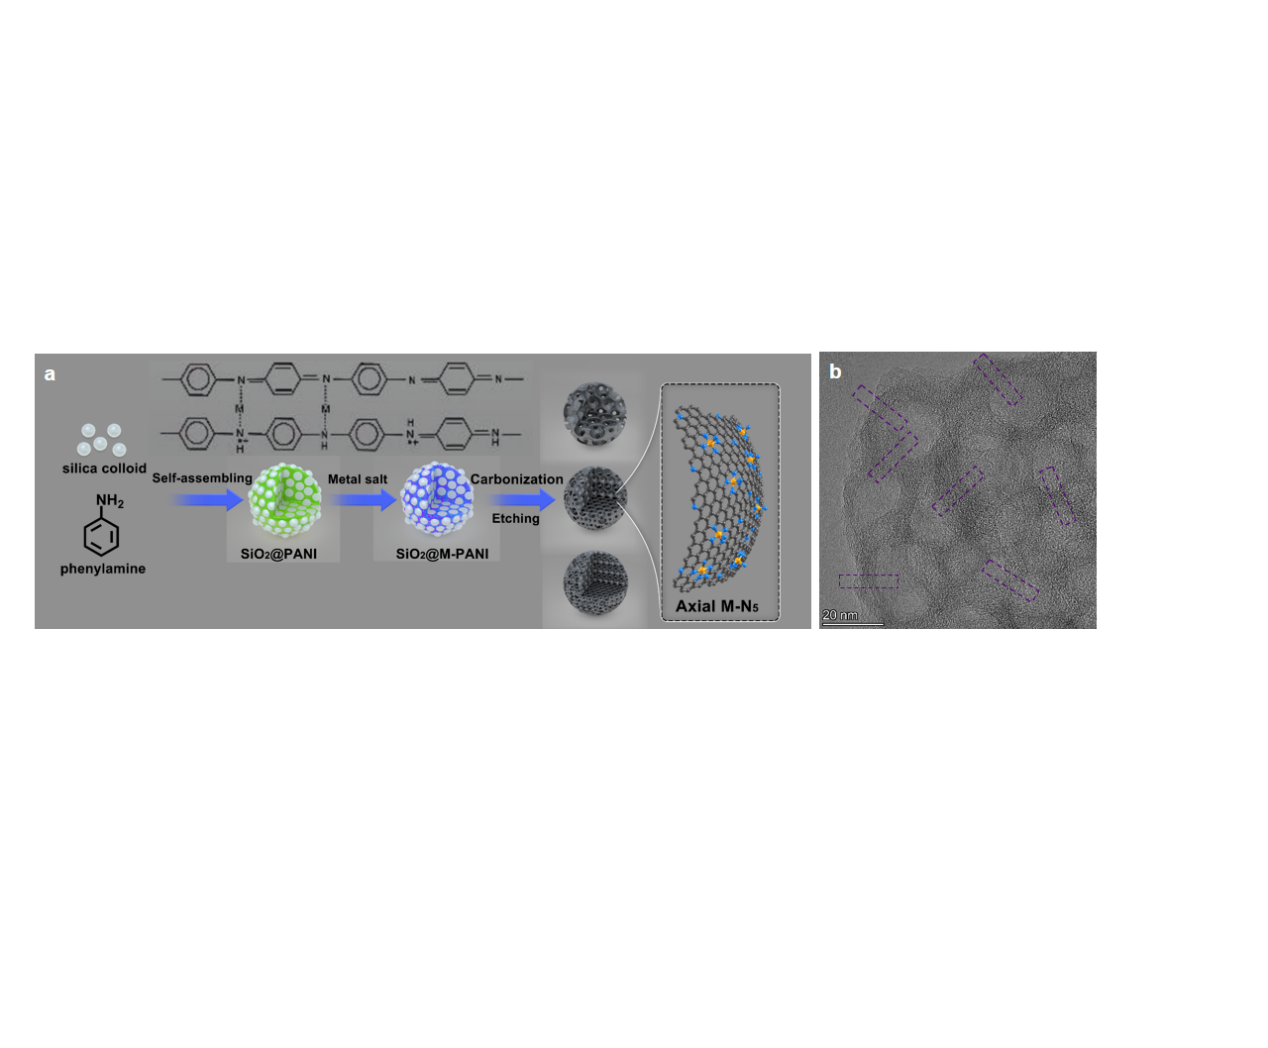


**Supplementary Figure 6.** (**a**) Schematic illustration of the synthesis process of Co-MSPNC and (**b**) different measured positions of thickness on HAADF-STEM image of Co-MSPNC-27.


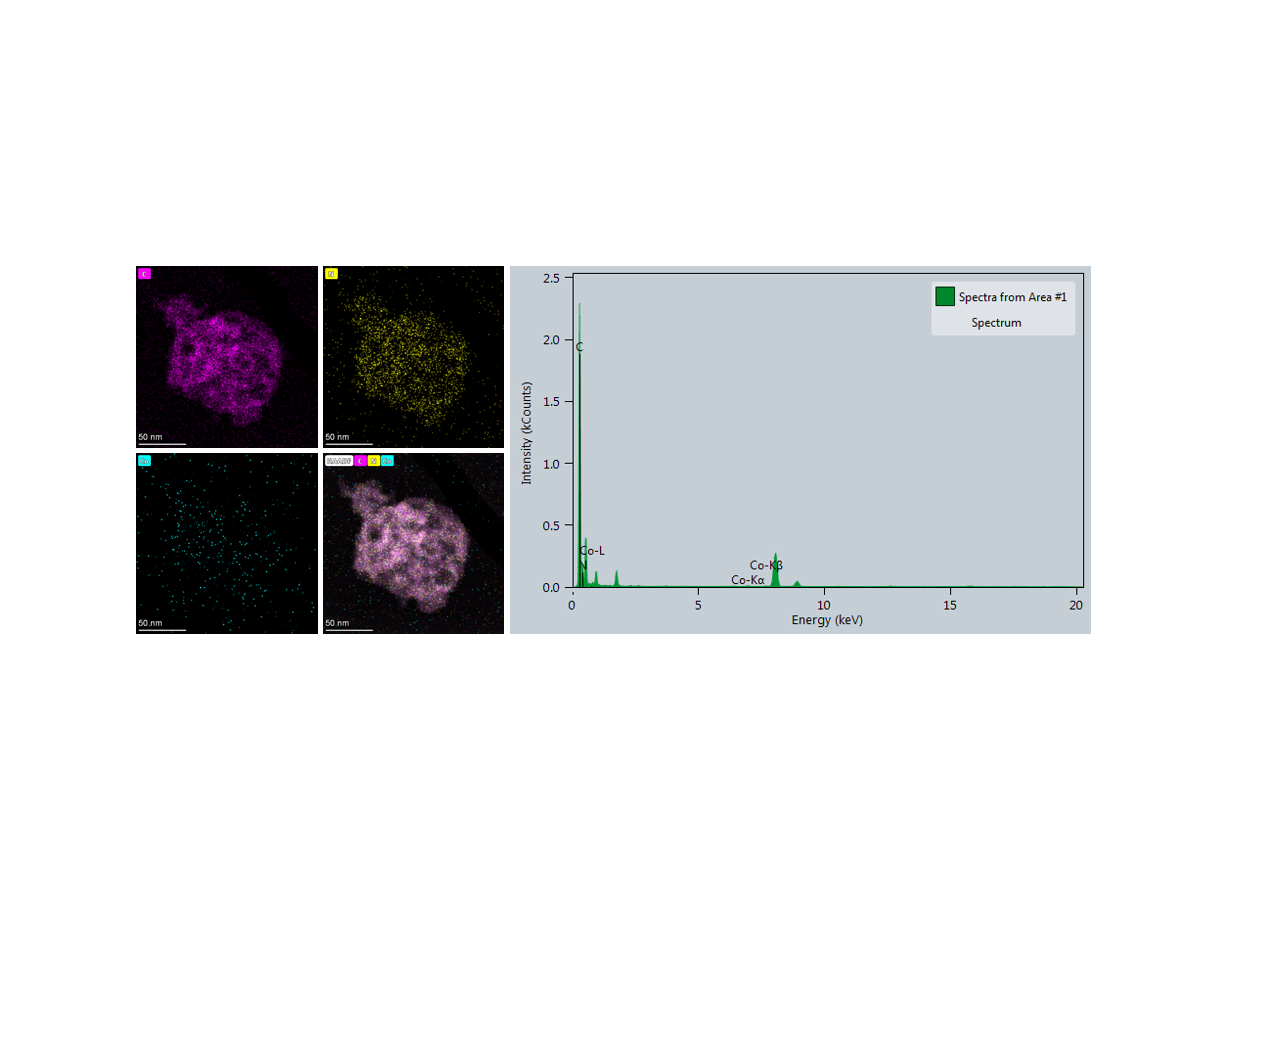


**Supplementary Figure 7.** Repeated measurement of EDX mappings of C, N, and Co elements of Co-MSPNC-27


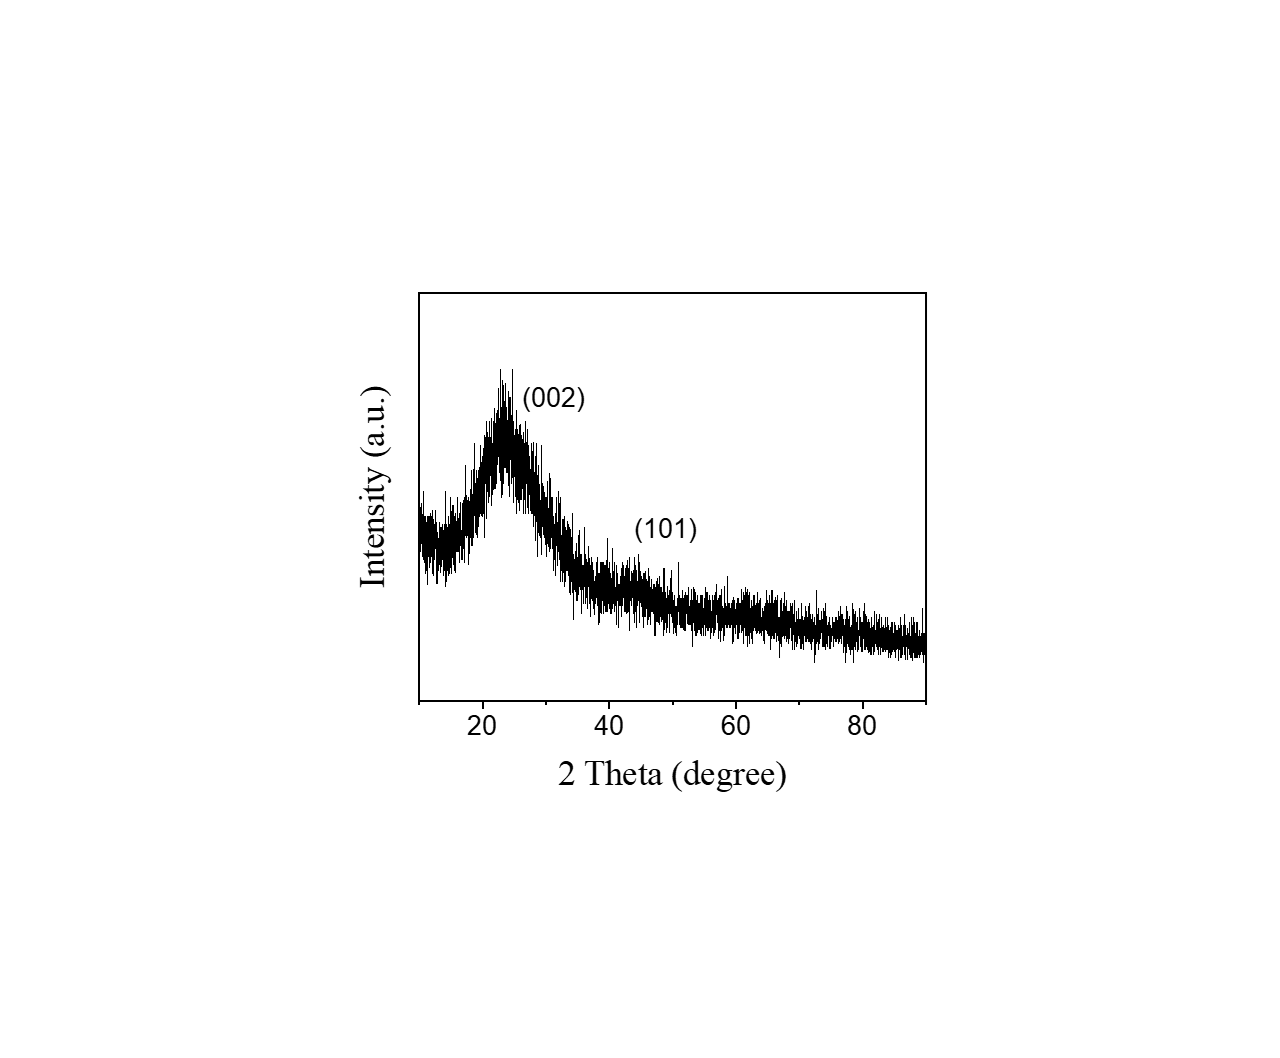


**Supplementary Figure 8.** XRD patterns of Co-MSPNC


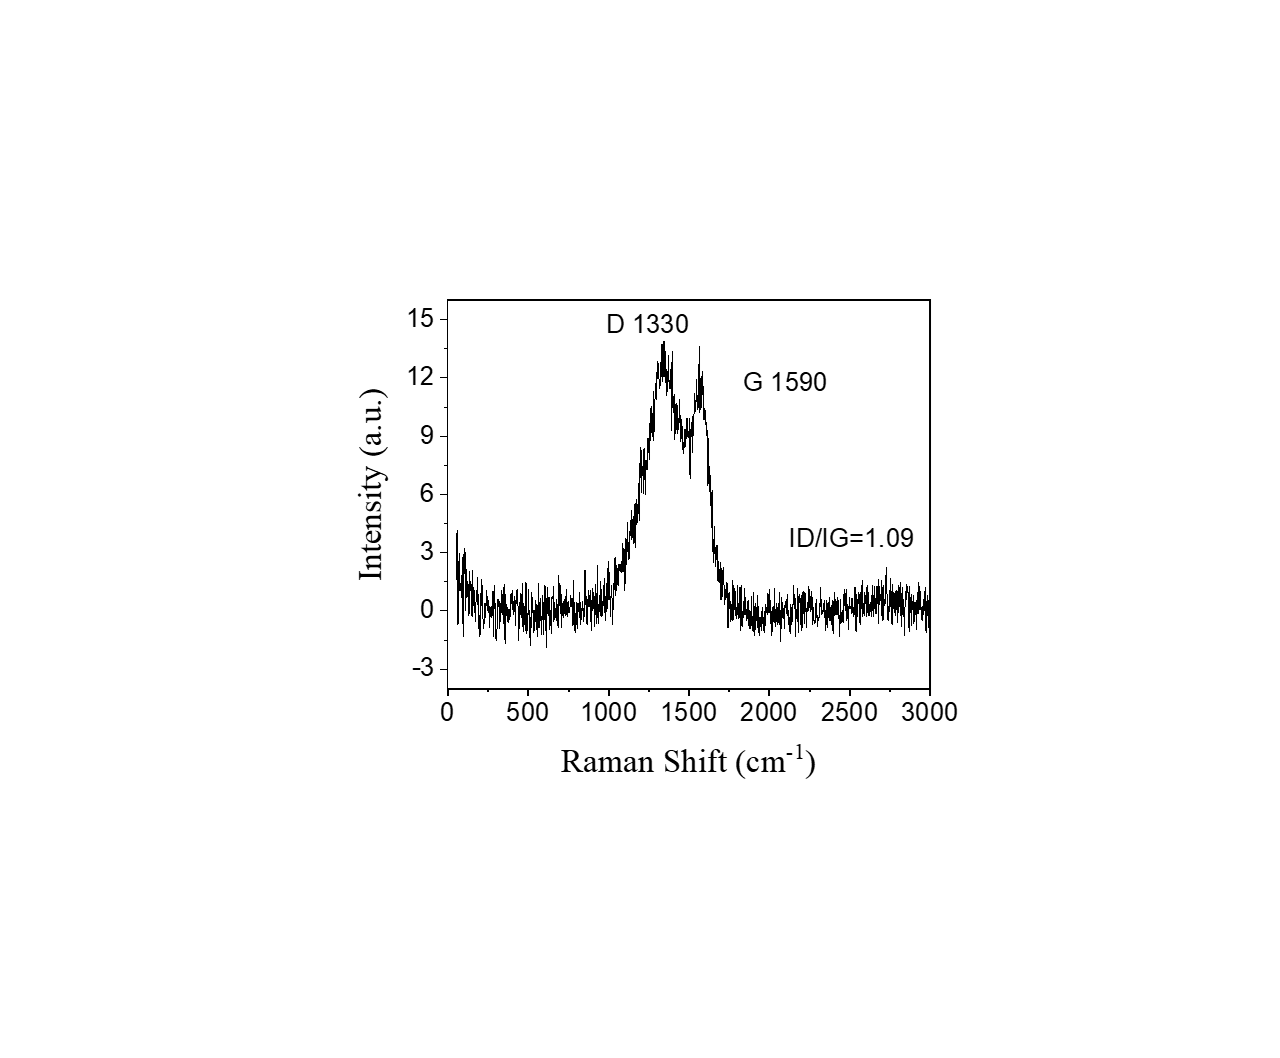


**Supplementary Figure 9.** Raman Shift of Co-MSPNC.


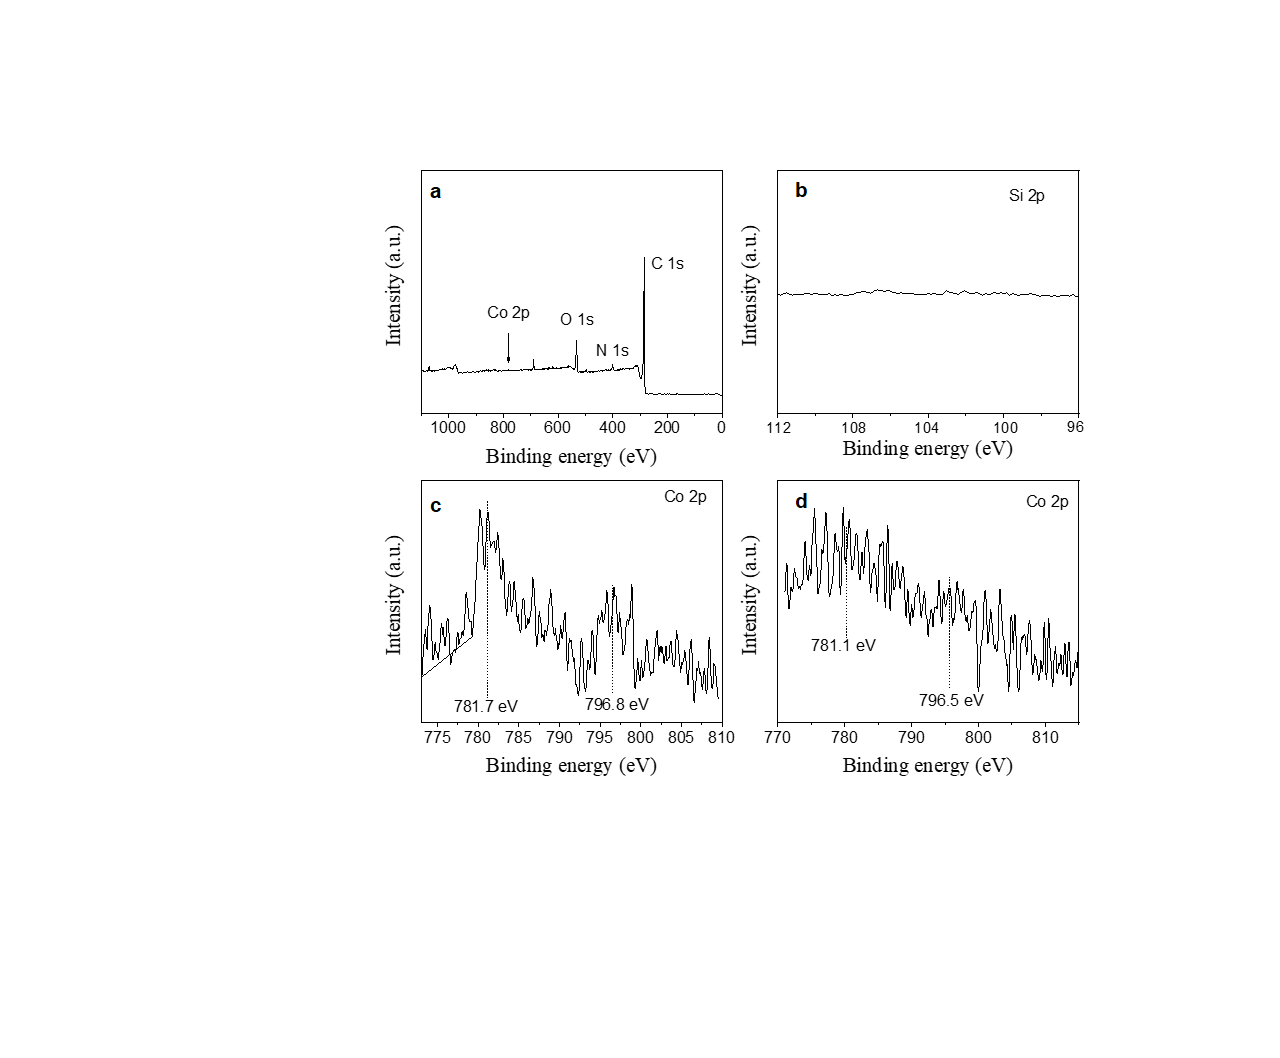


**Supplementary Figure 10.**  XPS survey spectrum ofCo-MSPNC-27(**a**), High resolution XPS Si 2p (**b**), Co 2p (**c**)(**d**) spectra of Co-MSPNC-27


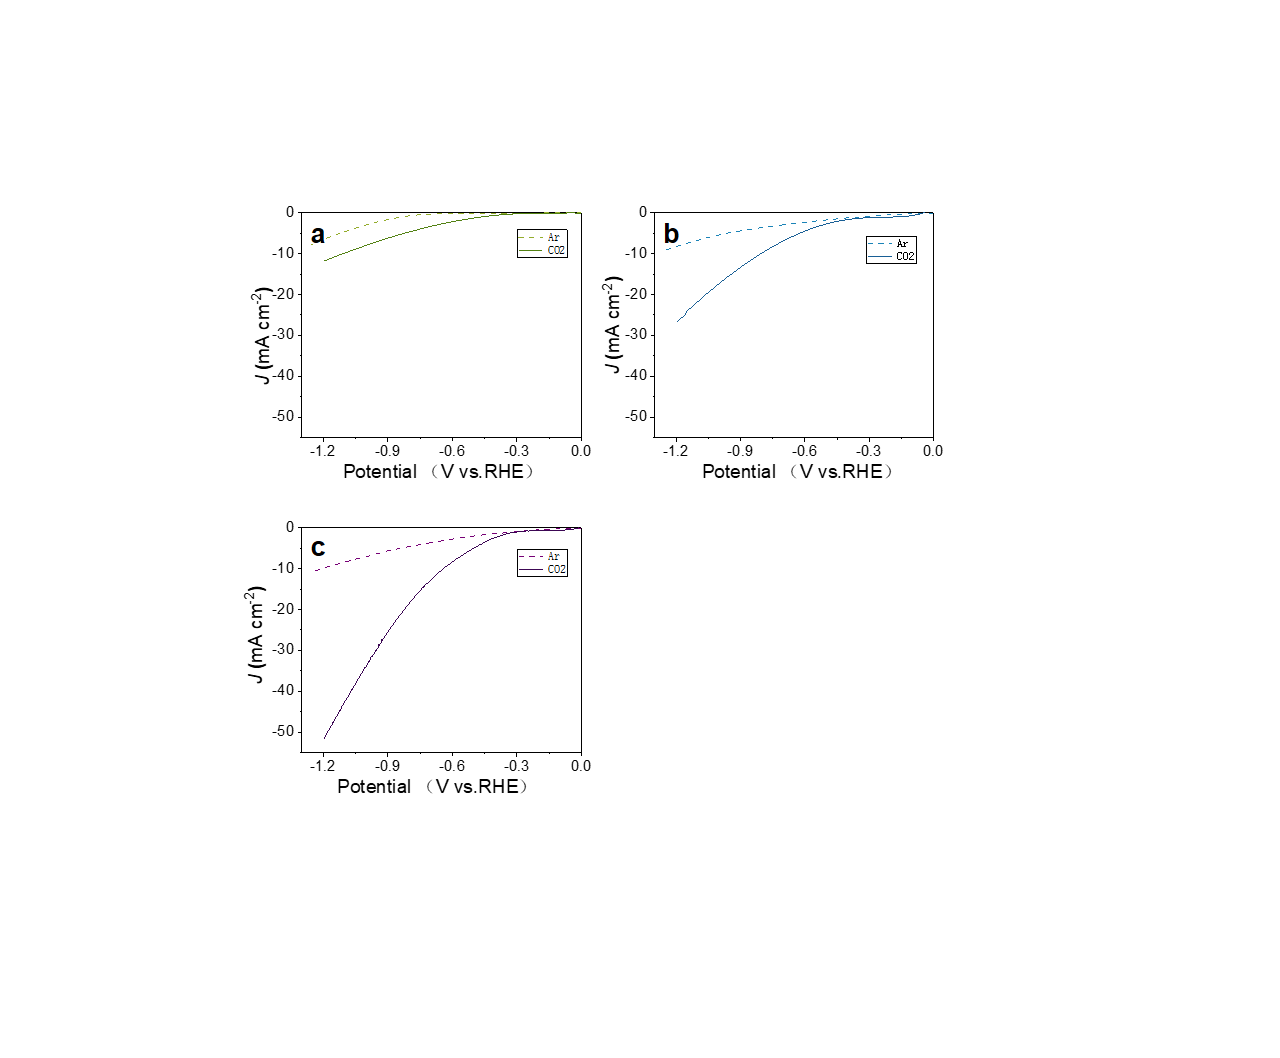


**Supplementary Figure 11.** Polarization curves of (**a**) Co-MSPNC-7, (**b**) Co-MSPNC-43, and (**c**) Co-MSPNC-27 in Ar-saturated (dash lines) and CO2-saturated (solid lines) 0.5 M KHCO3 solution.


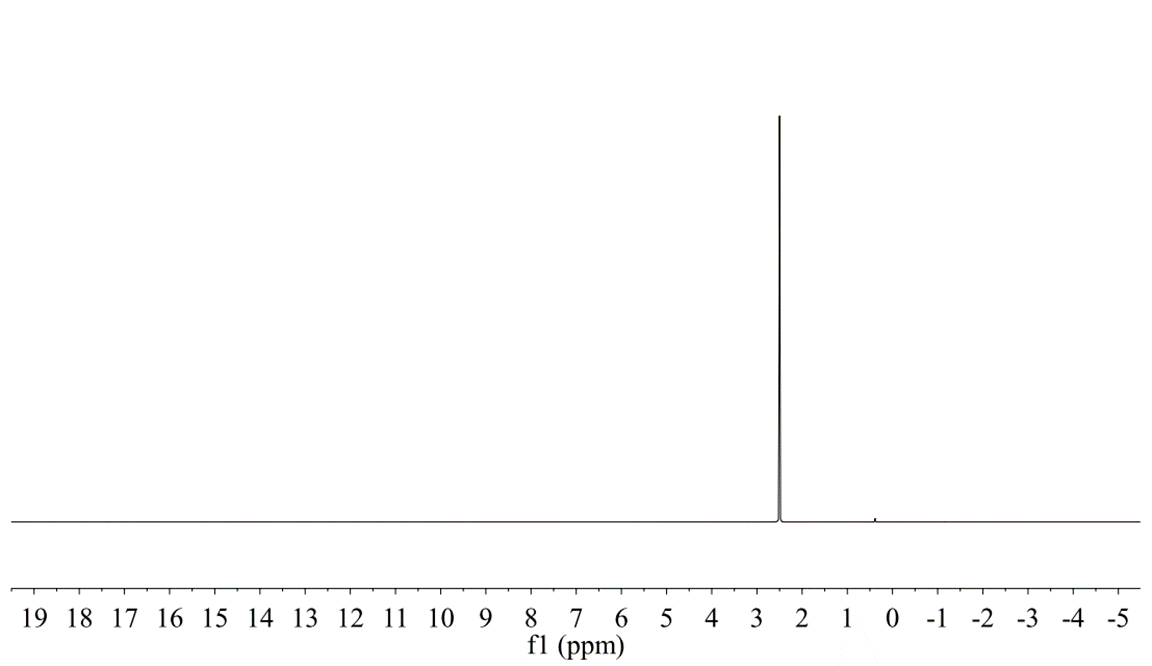


**Supplementary Figure 12.** NMR spectrum of electrolyte after electrochemical measurement


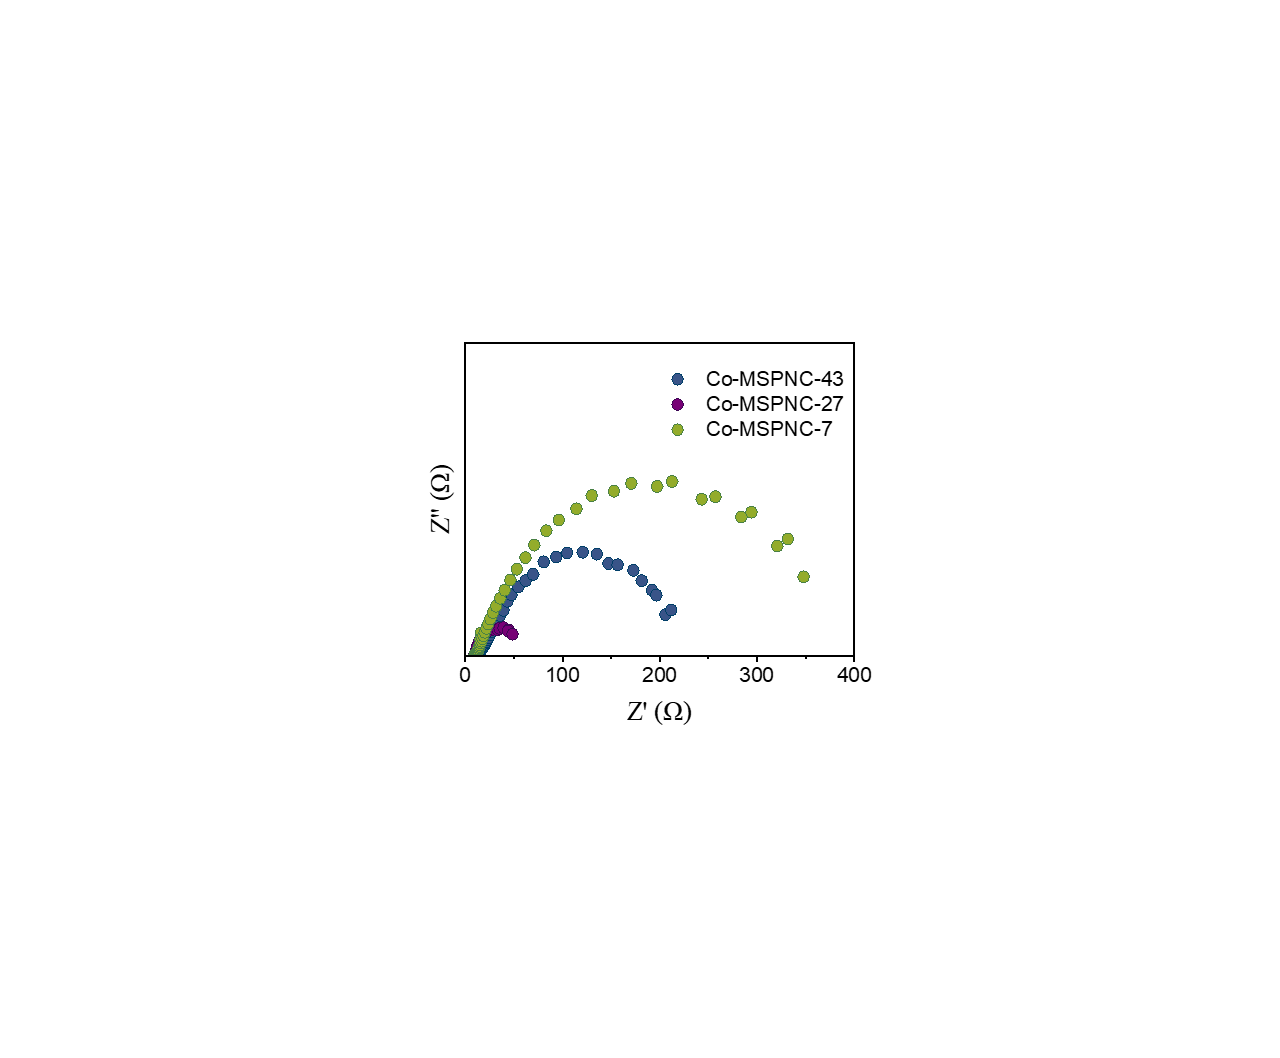


**Supplementary Figure 13.** Nyquist plots for Co-MSPNC-7, Co-MSPNC-43 and Co-MSPNC-27


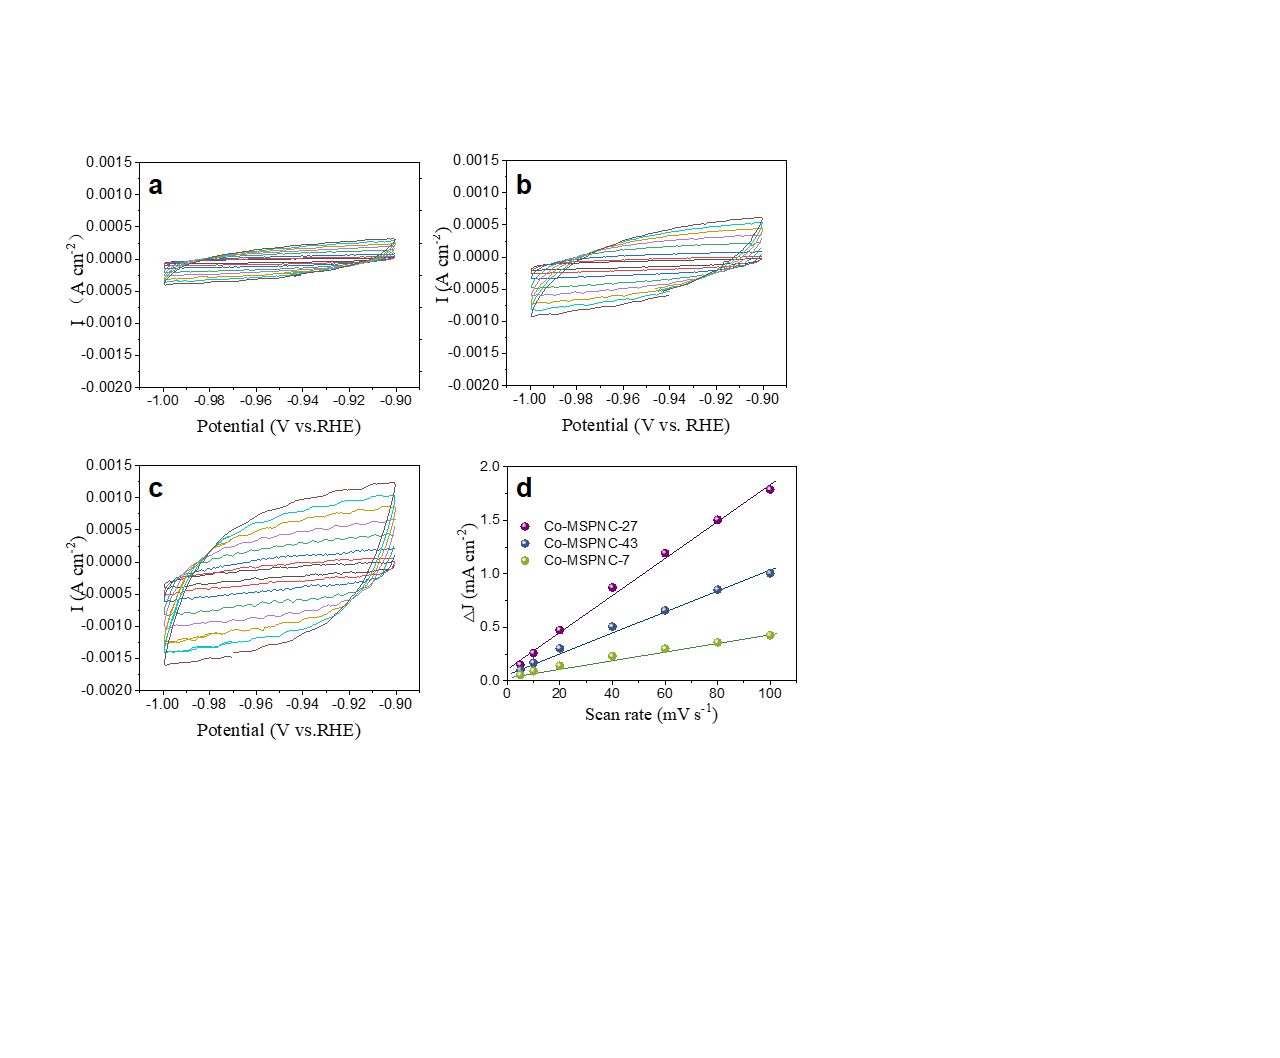


**Supplementary Figure 14.** ECSAs of (**a**) Co-MSPNC-7, (**b**) Co-MSPNC-43 and (**c**) Co-MSPNC-27 at various scan rates of 5, 10, 20, 40, 60, 80, 100mV s-1


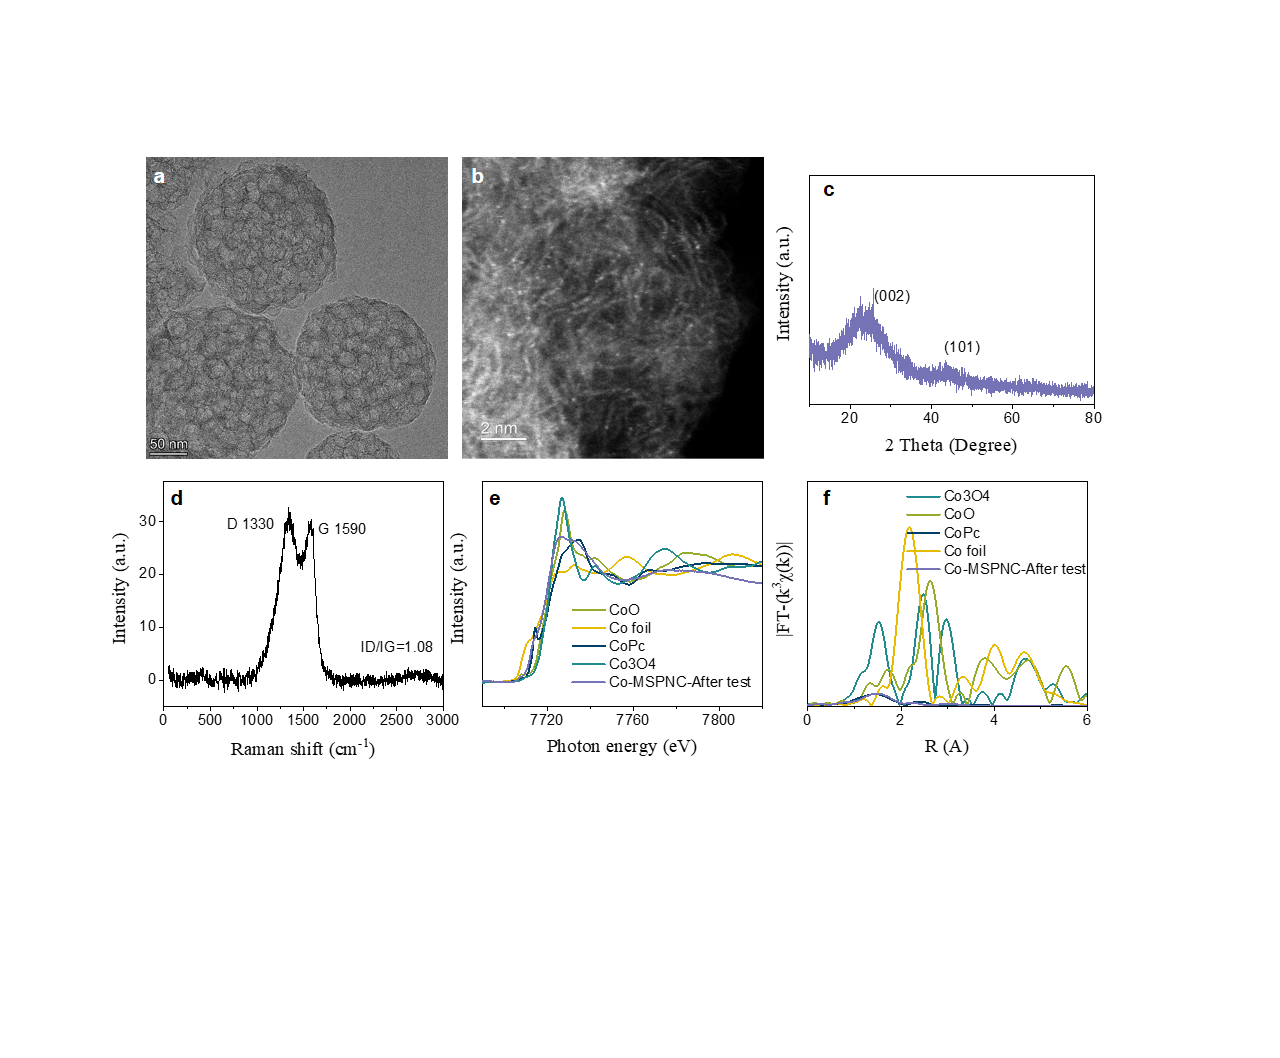


**Supplementary Figure 15.** (**a**) A typical HRTEM, (**b**) HAADF-STEM image, (**c**) XRD pattern and (**d**) Raman shift of Co-MSPNC-27 after performance testing and stability test. (**e**) Co K-edge k3-weighted EXAFS spectra, (**f**) Fitting curves of the FT-EXAFS spectra for Co-MSPNC-27 after performance testing and stability test.


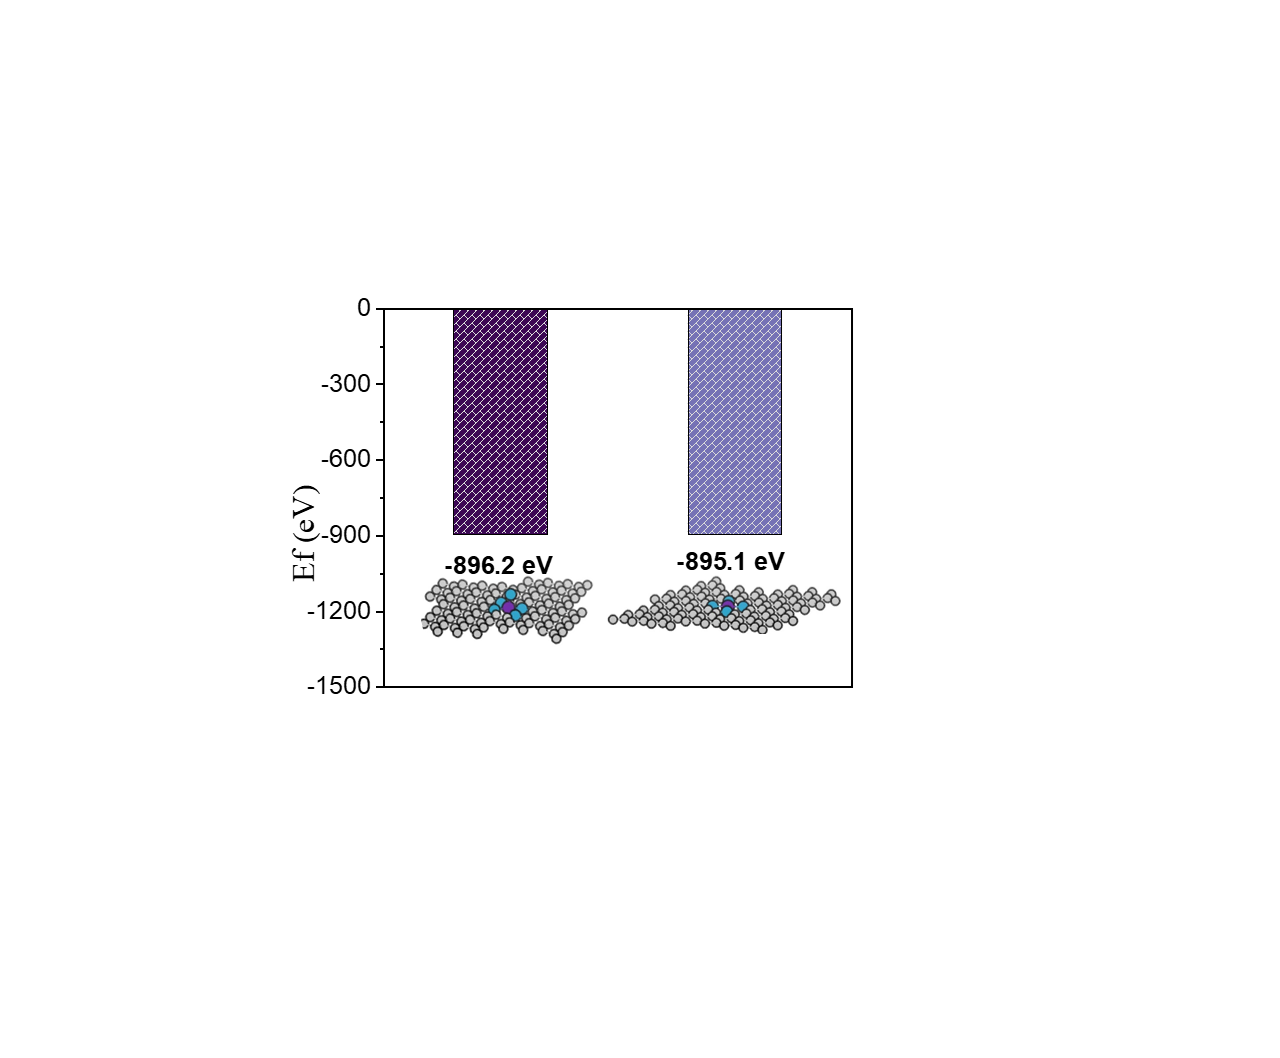


**Supplementary Figure 16.** The calculated total energy of Co-N4 and Co-N5 structure.


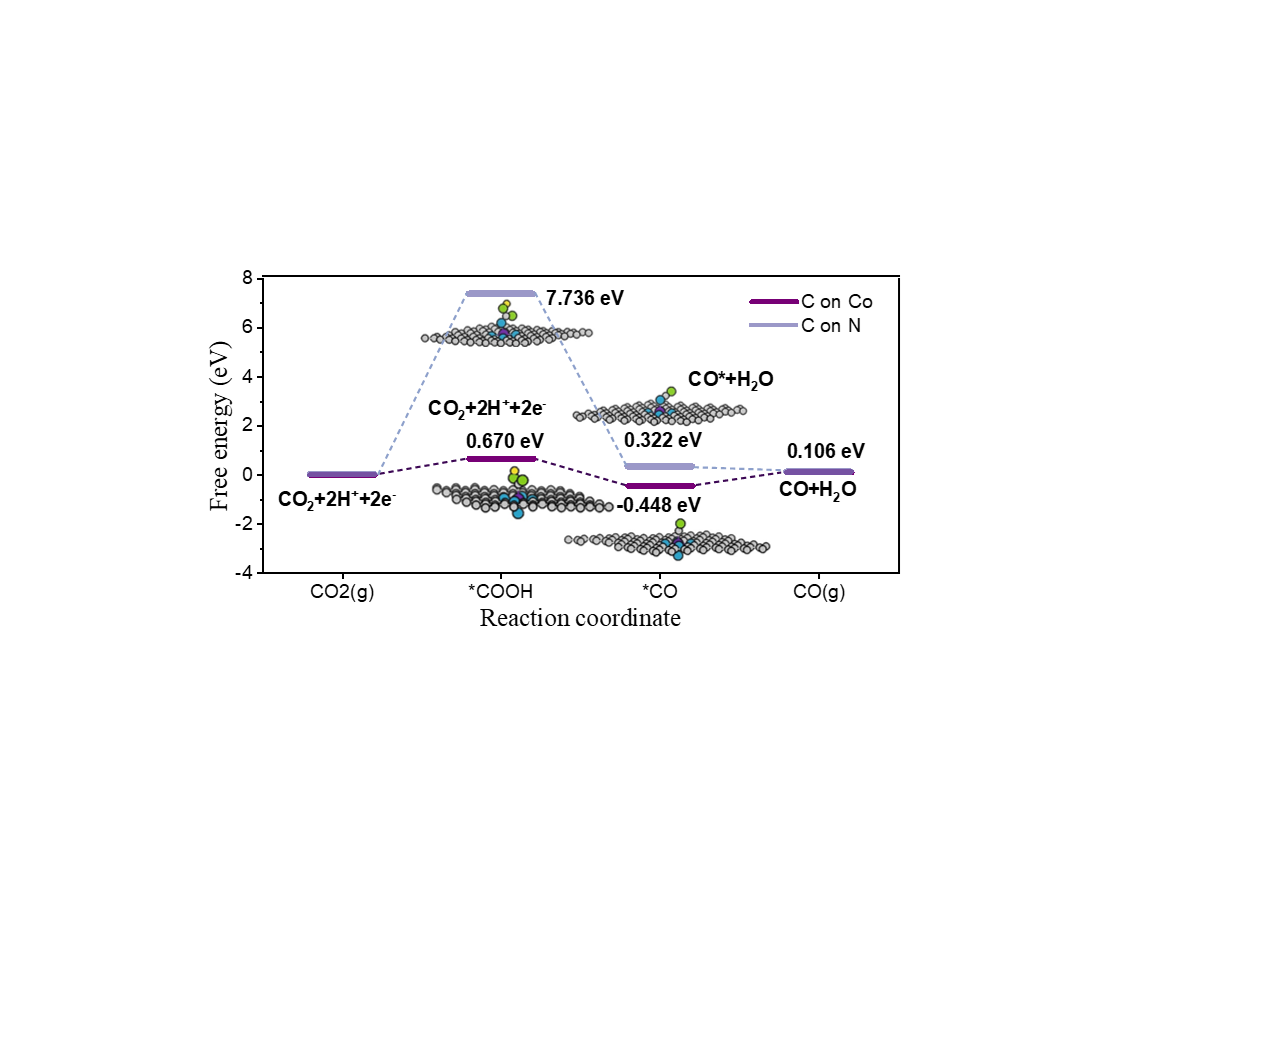


**Supplementary Figure 17.** The free energy of each intermediate state on the Co atom and N atom in Co-MSPNC-27.


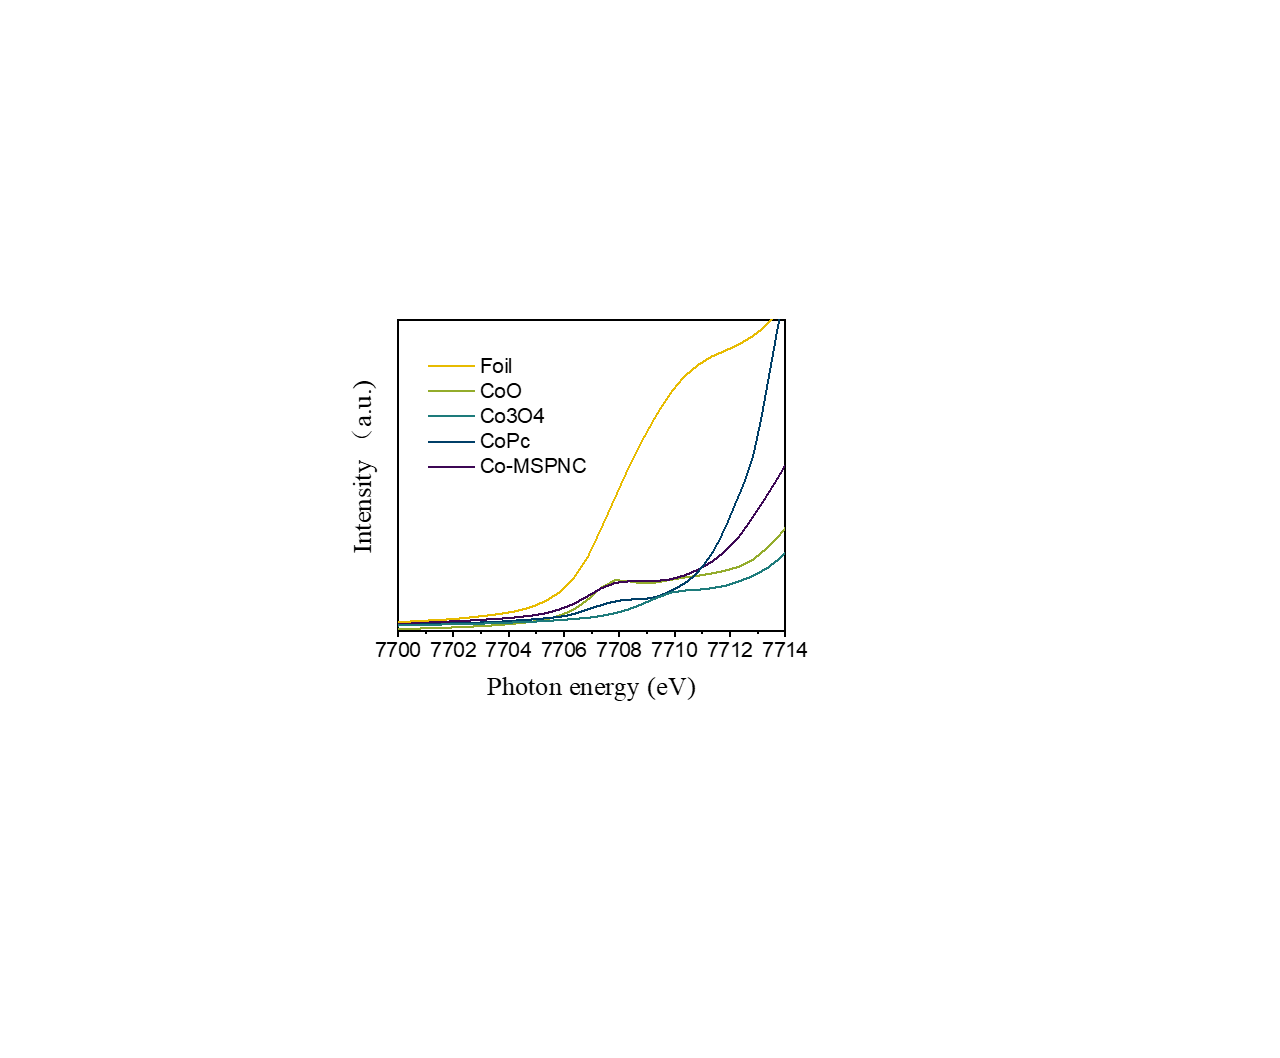


**Supplementary Figure 18.** Enlarged Co K-edge XANES spectra.

**Supplementary Table 1.** EXAFS fitting parameters at the Co K-edge for various samples

| Sample | Shell | N a | R (Å) b | σ2 (Å2·10-3) c | ΔE0 (eV) d | R factor (%) |
| --- | --- | --- | --- | --- | --- | --- |
| CoO | Co-O | 4 | 1.95 | 1.7 | 7.4 | 1.3 |
| Co3O4 | Co-O | 4 | 1.91 | 1.78 | 3.2 | 1.2 |
| Cofoil | Co-Co | 9 | 2.29 | 4.49 | 5.6 | 0.9 |
| CoPc | Co-N | 4 | 1.89 | 2.33 | 3.2 | 0.3 |
| Co-MSPNC | Co-N | 5.3 | 2.01 | 13.18 | -4.689 | 0.96 |

*a* *N*: coordination numbers; *b* *R*: bond distance; *c* *σ*2: Debye-Waller factors; *d* Δ*E*0: the inner potential correction. *R* factor: goodness of fit. *Ѕ*02 was set as 0.93 for Co-N, which was obtained from the experimental EXAFS fit of reference CoPc by fixing CN as the known crystallographic value and was fixed to all the samples.

**Supplementary Table 2.** Contributions to the free energy from the zero-point energy correction, enthalpic temperature correction, gas correction, entropy, and the calculated total free energy, respectively. The literature entropies taken from NIST are also listed. All values are given in eV.

| Gas phase | *EDFT* | *EZPE* | *TS* | *ΔHT* | *ΔHG* | *G* |
| --- | --- | --- | --- | --- | --- | --- |
| CO2 (g) | -22.95 | 0.31 | 0.67 | 0.10 | 0.13 | -23.08 |
| CO (g) | -14.78 | 0.13 | 0.60 | 0.09 | -0.51 | -15.66 |
| H2 (g) | -6.83 | 0.27 | 0.41 | 0.09 | -0.06 | -6.95 |
| H2O (g) | -14.22 | 0.57 | 0.67 | 0.10 | -0.08 | -14.28 |

**Supplementary Table 3.** Calculated electronic energy, ZPE, temperature enthalpy correction, and free energy of each CO2RR intermediate at 0 V (vs. RHE). The calculation of relative free energy uses CO2(g), H2(g) and H2O(l) as the reference states. All values are given in eV.

|  | Species | *EDFT* | *EZPE* | *ΔHT* | *G* |
| --- | --- | --- | --- | --- | --- |
| Co-N4 | * | -896.30 |  |  |  |
| *COOH | -922.51 | 0.51 | 0.11 | -921.89 |
| *CO | -911.85 | 0.15 | 0.06 | -911.68 |
| *H | -899.56 | 0.16 | 0.01 | -899.35 |
| Co-N5 | * | -895.09 |  |  |  |
| *COOH | -921.70 | 0.62 | 0.11 | -920.98 |
| *CO | -910.83 | 0.15 | 0.06 | -910.62 |
| *H | -897.88 | 0.18 | 0.01 | -897.69 |

**Supplementary Table 4.** The results of energies and magnetic moments convergence test

| Cell | *E(eV)* | *mag* |
| --- | --- | --- |
| 2*2*1 | -895.101 | 2 |
| 3*3*1 | -895.069 | 2.0036 |
| 4*4*1 | -895.093 | 2.0012 |
| 5*5*1 | -895.091 | 2.0015 |
| 6*6*1 | -895.089 | 2.0028 |

**Supplementary Table5.** Unit cell parameters


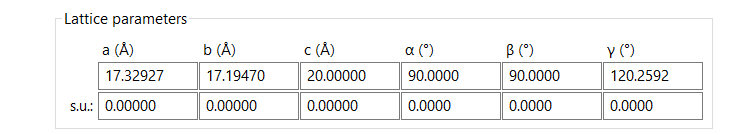


**Supplementary Table 6.** Comparison of TOF with other Co-based materials reported

| Material | F.E.CO | *E /*eV | TOF/h-1 | Ref. |
| --- | --- | --- | --- | --- |
| CoFPc | 93% | -0.8 | 5796 | *ACS Catal. 2016, 6, 3092-3095* |
| CoPPCl/CNT-OH | 90% | -0.65 | 7560 | *Angew. Chem. Int. Ed. 2019,* *58, 6595-6599,* |
| CoPPc/CNT | ~90% | -0.5 | 4900 | *Chem 2017,3, 652-664* |
| Co-N4 | 82% | -0.8 | 1455 | *Appl. Catal. B. 2019,240, 234-240* |
| Al2(OH)2TCPP-  Co | 76% | -0.7 | ~200 | *J. Am. Chem. Soc. 2015,137, 14129-14135* |
| CoPc-CN/CNT | 88% | -0.46 | 5040 | *Nat. Commun. 2017 8, 14675* |
| NapCo@SNG | 95% | -0.74 | 1620 | *Angew. Chem. Int. Ed.2019, 58, 13532-13539,* |
| Co−N5/HNPCSs | 90% | -0.73 | 480.2 | *J. Am. Chem. Soc. 2018,140, 4218-4221* |
| Co-MSPNC-27 | 96% | -0.9 | 10118 | This work |
